# Supplementary material for: When and where to hatch? Red-eyed treefrog embryos use light cues in two contexts
Source: PeerJ. 2018 Dec 3;6:e6018. doi: 10.7717/peerj.6018 (PMC6283037; doi:10.7717/peerj.6018)
Supplement: Supplemental Information 1 [file peerj-06-6018-s001.xlsx]

## Sheet: Hatching Data
Date	Clutch	Treatment	HoursSinceFirstCheck	TimeOfDay	Age-days	TestEggs	NewlyHatched	TotalHatched	ProportionHatched
20150804	221	dark	0	6	4.25	10	0	0	0
20150804	221	light	0	6	4.25	10	0	0	0
20150804	221	photoperiod	0	6	4.25	10	0	0	0
20150804	222	dark	0	6	4.25	7	0	0	0
20150804	222	light	0	6	4.25	7	0	0	0
20150804	222	photoperiod	0	6	4.25	7	0	0	0
20150804	230	dark	0	6	4.25	10	0	0	0
20150804	230	light	0	6	4.25	10	0	0	0
20150804	230	photoperiod	0	6	4.25	10	0	0	0
20150804	231	dark	0	6	4.25	10	0	0	0
20150804	231	light	0	6	4.25	10	0	0	0
20150804	231	photoperiod	0	6	4.25	10	0	0	0
20150804	232	dark	0	6	4.25	10	0	0	0
20150804	232	light	0	6	4.25	10	0	0	0
20150804	232	photoperiod	0	6	4.25	10	0	0	0
20150804	233	dark	0	6	4.25	10	0	0	0
20150804	233	light	0	6	4.25	10	0	0	0
20150804	233	photoperiod	0	6	4.25	10	0	0	0
20150804	234	dark	0	6	4.25	10	0	0	0
20150804	234	light	0	6	4.25	10	0	0	0
20150804	234	photoperiod	0	6	4.25	10	0	0	0
20150804	235	dark	0	6	4.25	10	0	0	0
20150804	235	light	0	6	4.25	10	0	0	0
20150804	235	photoperiod	0	6	4.25	7	0	0	0
20150804	236	dark	0	6	4.25	10	0	0	0
20150804	236	light	0	6	4.25	10	0	0	0
20150804	236	photoperiod	0	6	4.25	10	0	0	0
20150804	239	dark	0	6	4.25	7	0	0	0
20150804	239	light	0	6	4.25	7	0	0	0
20150804	239	photoperiod	0	6	4.25	7	0	0	0
20150804	240	dark	0	6	4.25	7	0	0	0
20150804	240	light	0	6	4.25	7	0	0	0
20150804	240	photoperiod	0	6	4.25	7	0	0	0
20150804	221	dark	2	8	4.33333	10	0	0	0
20150804	221	light	2	8	4.33333	10	0	0	0
20150804	221	photoperiod	2	8	4.33333	10	0	0	0
20150804	222	dark	2	8	4.33333	7	0	0	0
20150804	222	light	2	8	4.33333	7	0	0	0
20150804	222	photoperiod	2	8	4.33333	7	0	0	0
20150804	230	dark	2	8	4.33333	10	0	0	0
20150804	230	light	2	8	4.33333	10	0	0	0
20150804	230	photoperiod	2	8	4.33333	10	0	0	0
20150804	231	dark	2	8	4.33333	10	0	0	0
20150804	231	light	2	8	4.33333	10	0	0	0
20150804	231	photoperiod	2	8	4.33333	10	0	0	0
20150804	232	dark	2	8	4.33333	10	0	0	0
20150804	232	light	2	8	4.33333	10	0	0	0
20150804	232	photoperiod	2	8	4.33333	10	0	0	0
20150804	233	dark	2	8	4.33333	10	0	0	0
20150804	233	light	2	8	4.33333	10	0	0	0
20150804	233	photoperiod	2	8	4.33333	10	0	0	0
20150804	234	dark	2	8	4.33333	10	0	0	0
20150804	234	light	2	8	4.33333	10	0	0	0
20150804	234	photoperiod	2	8	4.33333	10	0	0	0
20150804	235	dark	2	8	4.33333	10	0	0	0
20150804	235	light	2	8	4.33333	10	0	0	0
20150804	235	photoperiod	2	8	4.33333	7	0	0	0
20150804	236	dark	2	8	4.33333	10	0	0	0
20150804	236	light	2	8	4.33333	10	2	2	0.2
20150804	236	photoperiod	2	8	4.33333	10	0	0	0
20150804	239	dark	2	8	4.33333	7	0	0	0
20150804	239	light	2	8	4.33333	7	0	0	0
20150804	239	photoperiod	2	8	4.33333	7	0	0	0
20150804	240	dark	2	8	4.33333	7	0	0	0
20150804	240	light	2	8	4.33333	7	0	0	0
20150804	240	photoperiod	2	8	4.33333	7	0	0	0
20150804	221	dark	4	10	4.41667	10	0	0	0
20150804	221	light	4	10	4.41667	10	0	0	0
20150804	221	photoperiod	4	10	4.41667	10	0	0	0
20150804	222	dark	4	10	4.41667	7	0	0	0
20150804	222	light	4	10	4.41667	7	0	0	0
20150804	222	photoperiod	4	10	4.41667	7	0	0	0
20150804	230	dark	4	10	4.41667	10	0	0	0
20150804	230	light	4	10	4.41667	10	0	0	0
20150804	230	photoperiod	4	10	4.41667	10	0	0	0
20150804	231	dark	4	10	4.41667	10	0	0	0
20150804	231	light	4	10	4.41667	10	0	0	0
20150804	231	photoperiod	4	10	4.41667	10	0	0	0
20150804	232	dark	4	10	4.41667	10	0	0	0
20150804	232	light	4	10	4.41667	10	0	0	0
20150804	232	photoperiod	4	10	4.41667	10	0	0	0
20150804	233	dark	4	10	4.41667	10	0	0	0
20150804	233	light	4	10	4.41667	10	0	0	0
20150804	233	photoperiod	4	10	4.41667	10	0	0	0
20150804	234	dark	4	10	4.41667	10	0	0	0
20150804	234	light	4	10	4.41667	10	0	0	0
20150804	234	photoperiod	4	10	4.41667	10	0	0	0
20150804	235	dark	4	10	4.41667	10	0	0	0
20150804	235	light	4	10	4.41667	10	0	0	0
20150804	235	photoperiod	4	10	4.41667	7	1	1	0.142857
20150804	236	dark	4	10	4.41667	10	0	0	0
20150804	236	light	4	10	4.41667	10	0	2	0.2
20150804	236	photoperiod	4	10	4.41667	10	0	0	0
20150804	239	dark	4	10	4.41667	7	0	0	0
20150804	239	light	4	10	4.41667	7	0	0	0
20150804	239	photoperiod	4	10	4.41667	7	0	0	0
20150804	240	dark	4	10	4.41667	7	0	0	0
20150804	240	light	4	10	4.41667	7	0	0	0
20150804	240	photoperiod	4	10	4.41667	7	0	0	0
20150804	221	dark	6	12	4.5	10	0	0	0
20150804	221	light	6	12	4.5	10	0	0	0
20150804	221	photoperiod	6	12	4.5	10	0	0	0
20150804	222	dark	6	12	4.5	7	0	0	0
20150804	222	light	6	12	4.5	7	0	0	0
20150804	222	photoperiod	6	12	4.5	7	0	0	0
20150804	230	dark	6	12	4.5	10	0	0	0
20150804	230	light	6	12	4.5	10	0	0	0
20150804	230	photoperiod	6	12	4.5	10	0	0	0
20150804	231	dark	6	12	4.5	10	0	0	0
20150804	231	light	6	12	4.5	10	0	0	0
20150804	231	photoperiod	6	12	4.5	10	0	0	0
20150804	232	dark	6	12	4.5	10	0	0	0
20150804	232	light	6	12	4.5	10	0	0	0
20150804	232	photoperiod	6	12	4.5	10	0	0	0
20150804	233	dark	6	12	4.5	10	0	0	0
20150804	233	light	6	12	4.5	10	0	0	0
20150804	233	photoperiod	6	12	4.5	10	0	0	0
20150804	234	dark	6	12	4.5	10	0	0	0
20150804	234	light	6	12	4.5	10	0	0	0
20150804	234	photoperiod	6	12	4.5	10	0	0	0
20150804	235	dark	6	12	4.5	10	0	0	0
20150804	235	light	6	12	4.5	10	0	0	0
20150804	235	photoperiod	6	12	4.5	7	0	1	0.142857
20150804	236	dark	6	12	4.5	10	0	0	0
20150804	236	light	6	12	4.5	10	0	2	0.2
20150804	236	photoperiod	6	12	4.5	10	0	0	0
20150804	239	dark	6	12	4.5	7	0	0	0
20150804	239	light	6	12	4.5	7	0	0	0
20150804	239	photoperiod	6	12	4.5	7	0	0	0
20150804	240	dark	6	12	4.5	7	0	0	0
20150804	240	light	6	12	4.5	7	0	0	0
20150804	240	photoperiod	6	12	4.5	7	0	0	0
20150804	221	dark	8	14	4.58333	10	0	0	0
20150804	221	light	8	14	4.58333	10	0	0	0
20150804	221	photoperiod	8	14	4.58333	10	0	0	0
20150804	222	dark	8	14	4.58333	7	0	0	0
20150804	222	light	8	14	4.58333	7	0	0	0
20150804	222	photoperiod	8	14	4.58333	7	0	0	0
20150804	230	dark	8	14	4.58333	10	0	0	0
20150804	230	light	8	14	4.58333	10	0	0	0
20150804	230	photoperiod	8	14	4.58333	10	0	0	0
20150804	231	dark	8	14	4.58333	10	0	0	0
20150804	231	light	8	14	4.58333	10	0	0	0
20150804	231	photoperiod	8	14	4.58333	10	0	0	0
20150804	232	dark	8	14	4.58333	10	0	0	0
20150804	232	light	8	14	4.58333	10	0	0	0
20150804	232	photoperiod	8	14	4.58333	10	0	0	0
20150804	233	dark	8	14	4.58333	10	0	0	0
20150804	233	light	8	14	4.58333	10	0	0	0
20150804	233	photoperiod	8	14	4.58333	10	0	0	0
20150804	234	dark	8	14	4.58333	10	0	0	0
20150804	234	light	8	14	4.58333	10	0	0	0
20150804	234	photoperiod	8	14	4.58333	10	0	0	0
20150804	235	dark	8	14	4.58333	10	0	0	0
20150804	235	light	8	14	4.58333	10	0	0	0
20150804	235	photoperiod	8	14	4.58333	7	0	1	0.142857
20150804	236	dark	8	14	4.58333	10	1	1	0.1
20150804	236	light	8	14	4.58333	10	0	2	0.2
20150804	236	photoperiod	8	14	4.58333	10	0	0	0
20150804	239	dark	8	14	4.58333	7	0	0	0
20150804	239	light	8	14	4.58333	7	0	0	0
20150804	239	photoperiod	8	14	4.58333	7	0	0	0
20150804	240	dark	8	14	4.58333	7	0	0	0
20150804	240	light	8	14	4.58333	7	0	0	0
20150804	240	photoperiod	8	14	4.58333	7	0	0	0
20150804	221	dark	10	16	4.66667	10	0	0	0
20150804	221	light	10	16	4.66667	10	0	0	0
20150804	221	photoperiod	10	16	4.66667	10	0	0	0
20150804	222	dark	10	16	4.66667	7	0	0	0
20150804	222	light	10	16	4.66667	7	0	0	0
20150804	222	photoperiod	10	16	4.66667	7	0	0	0
20150804	230	dark	10	16	4.66667	10	0	0	0
20150804	230	light	10	16	4.66667	10	0	0	0
20150804	230	photoperiod	10	16	4.66667	10	0	0	0
20150804	231	dark	10	16	4.66667	10	0	0	0
20150804	231	light	10	16	4.66667	10	0	0	0
20150804	231	photoperiod	10	16	4.66667	10	0	0	0
20150804	232	dark	10	16	4.66667	10	0	0	0
20150804	232	light	10	16	4.66667	10	0	0	0
20150804	232	photoperiod	10	16	4.66667	10	0	0	0
20150804	233	dark	10	16	4.66667	10	0	0	0
20150804	233	light	10	16	4.66667	10	0	0	0
20150804	233	photoperiod	10	16	4.66667	10	0	0	0
20150804	234	dark	10	16	4.66667	10	0	0	0
20150804	234	light	10	16	4.66667	10	0	0	0
20150804	234	photoperiod	10	16	4.66667	10	0	0	0
20150804	235	dark	10	16	4.66667	10	0	0	0
20150804	235	light	10	16	4.66667	10	0	0	0
20150804	235	photoperiod	10	16	4.66667	7	0	1	0.142857
20150804	236	dark	10	16	4.66667	10	0	1	0.1
20150804	236	light	10	16	4.66667	10	0	2	0.2
20150804	236	photoperiod	10	16	4.66667	10	0	0	0
20150804	239	dark	10	16	4.66667	7	0	0	0
20150804	239	light	10	16	4.66667	7	0	0	0
20150804	239	photoperiod	10	16	4.66667	7	0	0	0
20150804	240	dark	10	16	4.66667	7	0	0	0
20150804	240	light	10	16	4.66667	7	0	0	0
20150804	240	photoperiod	10	16	4.66667	7	0	0	0
20150804	221	dark	12	18	4.75	10	0	0	0
20150804	221	light	12	18	4.75	10	0	0	0
20150804	221	photoperiod	12	18	4.75	10	0	0	0
20150804	222	dark	12	18	4.75	7	0	0	0
20150804	222	light	12	18	4.75	7	0	0	0
20150804	222	photoperiod	12	18	4.75	7	0	0	0
20150804	230	dark	12	18	4.75	10	0	0	0
20150804	230	light	12	18	4.75	10	0	0	0
20150804	230	photoperiod	12	18	4.75	10	0	0	0
20150804	231	dark	12	18	4.75	10	0	0	0
20150804	231	light	12	18	4.75	10	0	0	0
20150804	231	photoperiod	12	18	4.75	10	0	0	0
20150804	232	dark	12	18	4.75	10	0	0	0
20150804	232	light	12	18	4.75	10	0	0	0
20150804	232	photoperiod	12	18	4.75	10	0	0	0
20150804	233	dark	12	18	4.75	10	0	0	0
20150804	233	light	12	18	4.75	10	0	0	0
20150804	233	photoperiod	12	18	4.75	10	0	0	0
20150804	234	dark	12	18	4.75	10	0	0	0
20150804	234	light	12	18	4.75	10	0	0	0
20150804	234	photoperiod	12	18	4.75	10	0	0	0
20150804	235	dark	12	18	4.75	10	0	0	0
20150804	235	light	12	18	4.75	10	0	0	0
20150804	235	photoperiod	12	18	4.75	7	0	1	0.142857
20150804	236	dark	12	18	4.75	10	0	1	0.1
20150804	236	light	12	18	4.75	10	0	2	0.2
20150804	236	photoperiod	12	18	4.75	10	0	0	0
20150804	239	dark	12	18	4.75	7	0	0	0
20150804	239	light	12	18	4.75	7	0	0	0
20150804	239	photoperiod	12	18	4.75	7	0	0	0
20150804	240	dark	12	18	4.75	7	0	0	0
20150804	240	light	12	18	4.75	7	0	0	0
20150804	240	photoperiod	12	18	4.75	7	0	0	0
20150804	221	dark	14	20	4.83333	10	0	0	0
20150804	221	light	14	20	4.83333	10	0	0	0
20150804	221	photoperiod	14	20	4.83333	10	0	0	0
20150804	222	dark	14	20	4.83333	7	0	0	0
20150804	222	light	14	20	4.83333	7	0	0	0
20150804	222	photoperiod	14	20	4.83333	7	0	0	0
20150804	230	dark	14	20	4.83333	10	0	0	0
20150804	230	light	14	20	4.83333	10	0	0	0
20150804	230	photoperiod	14	20	4.83333	10	0	0	0
20150804	231	dark	14	20	4.83333	10	0	0	0
20150804	231	light	14	20	4.83333	10	0	0	0
20150804	231	photoperiod	14	20	4.83333	10	0	0	0
20150804	232	dark	14	20	4.83333	10	0	0	0
20150804	232	light	14	20	4.83333	10	0	0	0
20150804	232	photoperiod	14	20	4.83333	10	2	2	0.2
20150804	233	dark	14	20	4.83333	10	0	0	0
20150804	233	light	14	20	4.83333	10	0	0	0
20150804	233	photoperiod	14	20	4.83333	10	0	0	0
20150804	234	dark	14	20	4.83333	10	0	0	0
20150804	234	light	14	20	4.83333	10	0	0	0
20150804	234	photoperiod	14	20	4.83333	10	0	0	0
20150804	235	dark	14	20	4.83333	10	0	0	0
20150804	235	light	14	20	4.83333	10	0	0	0
20150804	235	photoperiod	14	20	4.83333	7	0	1	0.142857
20150804	236	dark	14	20	4.83333	10	0	1	0.1
20150804	236	light	14	20	4.83333	10	0	2	0.2
20150804	236	photoperiod	14	20	4.83333	10	0	0	0
20150804	239	dark	14	20	4.83333	7	0	0	0
20150804	239	light	14	20	4.83333	7	0	0	0
20150804	239	photoperiod	14	20	4.83333	7	0	0	0
20150804	240	dark	14	20	4.83333	7	0	0	0
20150804	240	light	14	20	4.83333	7	0	0	0
20150804	240	photoperiod	14	20	4.83333	7	0	0	0
20150804	221	dark	16	22	4.91667	10	0	0	0
20150804	221	light	16	22	4.91667	10	0	0	0
20150804	221	photoperiod	16	22	4.91667	10	3	3	0.3
20150804	222	dark	16	22	4.91667	7	0	0	0
20150804	222	light	16	22	4.91667	7	0	0	0
20150804	222	photoperiod	16	22	4.91667	7	0	0	0
20150804	230	dark	16	22	4.91667	10	0	0	0
20150804	230	light	16	22	4.91667	10	0	0	0
20150804	230	photoperiod	16	22	4.91667	10	0	0	0
20150804	231	dark	16	22	4.91667	10	0	0	0
20150804	231	light	16	22	4.91667	10	0	0	0
20150804	231	photoperiod	16	22	4.91667	10	0	0	0
20150804	232	dark	16	22	4.91667	10	1	1	0.1
20150804	232	light	16	22	4.91667	10	0	0	0
20150804	232	photoperiod	16	22	4.91667	10	0	2	0.2
20150804	233	dark	16	22	4.91667	10	1	1	0.1
20150804	233	light	16	22	4.91667	10	0	0	0
20150804	233	photoperiod	16	22	4.91667	10	0	0	0
20150804	234	dark	16	22	4.91667	10	0	0	0
20150804	234	light	16	22	4.91667	10	0	0	0
20150804	234	photoperiod	16	22	4.91667	10	0	0	0
20150804	235	dark	16	22	4.91667	10	0	0	0
20150804	235	light	16	22	4.91667	10	0	0	0
20150804	235	photoperiod	16	22	4.91667	7	0	1	0.142857
20150804	236	dark	16	22	4.91667	10	1	2	0.2
20150804	236	light	16	22	4.91667	10	0	2	0.2
20150804	236	photoperiod	16	22	4.91667	10	0	0	0
20150804	239	dark	16	22	4.91667	7	0	0	0
20150804	239	light	16	22	4.91667	7	0	0	0
20150804	239	photoperiod	16	22	4.91667	7	0	0	0
20150804	240	dark	16	22	4.91667	7	0	0	0
20150804	240	light	16	22	4.91667	7	0	0	0
20150804	240	photoperiod	16	22	4.91667	7	0	0	0
20150805	221	dark	18	0	5	10	0	0	0
20150805	221	light	18	0	5	10	0	0	0
20150805	221	photoperiod	18	0	5	10	0	3	0.3
20150805	222	dark	18	0	5	7	0	0	0
20150805	222	light	18	0	5	7	0	0	0
20150805	222	photoperiod	18	0	5	7	0	0	0
20150805	230	dark	18	0	5	10	0	0	0
20150805	230	light	18	0	5	10	0	0	0
20150805	230	photoperiod	18	0	5	10	0	0	0
20150805	231	dark	18	0	5	10	0	0	0
20150805	231	light	18	0	5	10	0	0	0
20150805	231	photoperiod	18	0	5	10	0	0	0
20150805	232	dark	18	0	5	10	0	1	0.1
20150805	232	light	18	0	5	10	0	0	0
20150805	232	photoperiod	18	0	5	10	1	3	0.3
20150805	233	dark	18	0	5	10	0	1	0.1
20150805	233	light	18	0	5	10	0	0	0
20150805	233	photoperiod	18	0	5	10	1	1	0.1
20150805	234	dark	18	0	5	10	0	0	0
20150805	234	light	18	0	5	10	0	0	0
20150805	234	photoperiod	18	0	5	10	0	0	0
20150805	235	dark	18	0	5	10	0	0	0
20150805	235	light	18	0	5	10	1	1	0.1
20150805	235	photoperiod	18	0	5	7	0	1	0.142857
20150805	236	dark	18	0	5	10	0	2	0.2
20150805	236	light	18	0	5	10	0	2	0.2
20150805	236	photoperiod	18	0	5	10	0	0	0
20150805	239	dark	18	0	5	7	0	0	0
20150805	239	light	18	0	5	7	0	0	0
20150805	239	photoperiod	18	0	5	7	0	0	0
20150805	240	dark	18	0	5	7	0	0	0
20150805	240	light	18	0	5	7	0	0	0
20150805	240	photoperiod	18	0	5	7	0	0	0
20150805	221	dark	20	2	5.08333	10	0	0	0
20150805	221	light	20	2	5.08333	10	0	0	0
20150805	221	photoperiod	20	2	5.08333	10	0	3	0.3
20150805	222	dark	20	2	5.08333	7	0	0	0
20150805	222	light	20	2	5.08333	7	0	0	0
20150805	222	photoperiod	20	2	5.08333	7	0	0	0
20150805	230	dark	20	2	5.08333	10	0	0	0
20150805	230	light	20	2	5.08333	10	0	0	0
20150805	230	photoperiod	20	2	5.08333	10	0	0	0
20150805	231	dark	20	2	5.08333	10	0	0	0
20150805	231	light	20	2	5.08333	10	0	0	0
20150805	231	photoperiod	20	2	5.08333	10	0	0	0
20150805	232	dark	20	2	5.08333	10	0	1	0.1
20150805	232	light	20	2	5.08333	10	0	0	0
20150805	232	photoperiod	20	2	5.08333	10	1	4	0.4
20150805	233	dark	20	2	5.08333	10	4	5	0.5
20150805	233	light	20	2	5.08333	10	0	0	0
20150805	233	photoperiod	20	2	5.08333	10	0	1	0.1
20150805	234	dark	20	2	5.08333	10	0	0	0
20150805	234	light	20	2	5.08333	10	0	0	0
20150805	234	photoperiod	20	2	5.08333	10	0	0	0
20150805	235	dark	20	2	5.08333	10	0	0	0
20150805	235	light	20	2	5.08333	10	0	1	0.1
20150805	235	photoperiod	20	2	5.08333	7	0	1	0.142857
20150805	236	dark	20	2	5.08333	10	2	4	0.4
20150805	236	light	20	2	5.08333	10	0	2	0.2
20150805	236	photoperiod	20	2	5.08333	10	0	0	0
20150805	239	dark	20	2	5.08333	7	0	0	0
20150805	239	light	20	2	5.08333	7	0	0	0
20150805	239	photoperiod	20	2	5.08333	7	0	0	0
20150805	240	dark	20	2	5.08333	7	0	0	0
20150805	240	light	20	2	5.08333	7	0	0	0
20150805	240	photoperiod	20	2	5.08333	7	0	0	0
20150805	221	dark	22	4	5.16667	10	0	0	0
20150805	221	light	22	4	5.16667	10	0	0	0
20150805	221	photoperiod	22	4	5.16667	10	0	3	0.3
20150805	222	dark	22	4	5.16667	7	0	0	0
20150805	222	light	22	4	5.16667	7	0	0	0
20150805	222	photoperiod	22	4	5.16667	7	0	0	0
20150805	230	dark	22	4	5.16667	10	0	0	0
20150805	230	light	22	4	5.16667	10	0	0	0
20150805	230	photoperiod	22	4	5.16667	10	0	0	0
20150805	231	dark	22	4	5.16667	10	0	0	0
20150805	231	light	22	4	5.16667	10	0	0	0
20150805	231	photoperiod	22	4	5.16667	10	0	0	0
20150805	232	dark	22	4	5.16667	10	9	10	1
20150805	232	light	22	4	5.16667	10	0	0	0
20150805	232	photoperiod	22	4	5.16667	10	1	5	0.5
20150805	233	dark	22	4	5.16667	10	0	5	0.5
20150805	233	light	22	4	5.16667	10	0	0	0
20150805	233	photoperiod	22	4	5.16667	10	0	1	0.1
20150805	234	dark	22	4	5.16667	10	0	0	0
20150805	234	light	22	4	5.16667	10	0	0	0
20150805	234	photoperiod	22	4	5.16667	10	0	0	0
20150805	235	dark	22	4	5.16667	10	0	0	0
20150805	235	light	22	4	5.16667	10	0	1	0.1
20150805	235	photoperiod	22	4	5.16667	7	0	1	0.142857
20150805	236	dark	22	4	5.16667	10	0	4	0.4
20150805	236	light	22	4	5.16667	10	0	2	0.2
20150805	236	photoperiod	22	4	5.16667	10	0	0	0
20150805	239	dark	22	4	5.16667	7	0	0	0
20150805	239	light	22	4	5.16667	7	0	0	0
20150805	239	photoperiod	22	4	5.16667	7	0	0	0
20150805	240	dark	22	4	5.16667	7	0	0	0
20150805	240	light	22	4	5.16667	7	0	0	0
20150805	240	photoperiod	22	4	5.16667	7	0	0	0
20150805	221	dark	24	6	5.25	10	0	0	0
20150805	221	light	24	6	5.25	10	0	0	0
20150805	221	photoperiod	24	6	5.25	10	0	3	0.3
20150805	222	dark	24	6	5.25	7	0	0	0
20150805	222	light	24	6	5.25	7	1	1	0.142857
20150805	222	photoperiod	24	6	5.25	7	0	0	0
20150805	230	dark	24	6	5.25	10	0	0	0
20150805	230	light	24	6	5.25	10	0	0	0
20150805	230	photoperiod	24	6	5.25	10	0	0	0
20150805	231	dark	24	6	5.25	10	0	0	0
20150805	231	light	24	6	5.25	10	0	0	0
20150805	231	photoperiod	24	6	5.25	10	0	0	0
20150805	232	dark	24	6	5.25	10	0	10	1
20150805	232	light	24	6	5.25	10	0	0	0
20150805	232	photoperiod	24	6	5.25	10	1	6	0.6
20150805	233	dark	24	6	5.25	10	0	5	0.5
20150805	233	light	24	6	5.25	10	0	0	0
20150805	233	photoperiod	24	6	5.25	10	0	1	0.1
20150805	234	dark	24	6	5.25	10	0	0	0
20150805	234	light	24	6	5.25	10	0	0	0
20150805	234	photoperiod	24	6	5.25	10	0	0	0
20150805	235	dark	24	6	5.25	10	0	0	0
20150805	235	light	24	6	5.25	10	3	4	0.4
20150805	235	photoperiod	24	6	5.25	7	0	1	0.142857
20150805	236	dark	24	6	5.25	10	0	4	0.4
20150805	236	light	24	6	5.25	10	0	2	0.2
20150805	236	photoperiod	24	6	5.25	10	2	2	0.2
20150805	239	dark	24	6	5.25	7	0	0	0
20150805	239	light	24	6	5.25	7	0	0	0
20150805	239	photoperiod	24	6	5.25	7	0	0	0
20150805	240	dark	24	6	5.25	7	0	0	0
20150805	240	light	24	6	5.25	7	0	0	0
20150805	240	photoperiod	24	6	5.25	7	0	0	0
20150805	221	dark	26	8	5.33333	10	0	0	0
20150805	221	light	26	8	5.33333	10	0	0	0
20150805	221	photoperiod	26	8	5.33333	10	0	3	0.3
20150805	222	dark	26	8	5.33333	7	0	0	0
20150805	222	light	26	8	5.33333	7	0	1	0.142857
20150805	222	photoperiod	26	8	5.33333	7	0	0	0
20150805	230	dark	26	8	5.33333	10	0	0	0
20150805	230	light	26	8	5.33333	10	0	0	0
20150805	230	photoperiod	26	8	5.33333	10	0	0	0
20150805	231	dark	26	8	5.33333	10	0	0	0
20150805	231	light	26	8	5.33333	10	0	0	0
20150805	231	photoperiod	26	8	5.33333	10	0	0	0
20150805	232	dark	26	8	5.33333	10	0	10	1
20150805	232	light	26	8	5.33333	10	0	0	0
20150805	232	photoperiod	26	8	5.33333	10	0	6	0.6
20150805	233	dark	26	8	5.33333	10	0	5	0.5
20150805	233	light	26	8	5.33333	10	0	0	0
20150805	233	photoperiod	26	8	5.33333	10	0	1	0.1
20150805	234	dark	26	8	5.33333	10	0	0	0
20150805	234	light	26	8	5.33333	10	0	0	0
20150805	234	photoperiod	26	8	5.33333	10	0	0	0
20150805	235	dark	26	8	5.33333	10	0	0	0
20150805	235	light	26	8	5.33333	10	0	4	0.4
20150805	235	photoperiod	26	8	5.33333	7	0	1	0.142857
20150805	236	dark	26	8	5.33333	10	0	4	0.4
20150805	236	light	26	8	5.33333	10	1	3	0.3
20150805	236	photoperiod	26	8	5.33333	10	0	2	0.2
20150805	239	dark	26	8	5.33333	7	0	0	0
20150805	239	light	26	8	5.33333	7	0	0	0
20150805	239	photoperiod	26	8	5.33333	7	0	0	0
20150805	240	dark	26	8	5.33333	7	0	0	0
20150805	240	light	26	8	5.33333	7	0	0	0
20150805	240	photoperiod	26	8	5.33333	7	0	0	0
20150805	221	dark	28	10	5.41667	10	0	0	0
20150805	221	light	28	10	5.41667	10	0	0	0
20150805	221	photoperiod	28	10	5.41667	10	0	3	0.3
20150805	222	dark	28	10	5.41667	7	0	0	0
20150805	222	light	28	10	5.41667	7	0	1	0.142857
20150805	222	photoperiod	28	10	5.41667	7	0	0	0
20150805	230	dark	28	10	5.41667	10	0	0	0
20150805	230	light	28	10	5.41667	10	0	0	0
20150805	230	photoperiod	28	10	5.41667	10	1	1	0.1
20150805	231	dark	28	10	5.41667	10	0	0	0
20150805	231	light	28	10	5.41667	10	0	0	0
20150805	231	photoperiod	28	10	5.41667	10	0	0	0
20150805	232	dark	28	10	5.41667	10	0	10	1
20150805	232	light	28	10	5.41667	10	0	0	0
20150805	232	photoperiod	28	10	5.41667	10	0	6	0.6
20150805	233	dark	28	10	5.41667	10	0	5	0.5
20150805	233	light	28	10	5.41667	10	0	0	0
20150805	233	photoperiod	28	10	5.41667	10	1	2	0.2
20150805	234	dark	28	10	5.41667	10	0	0	0
20150805	234	light	28	10	5.41667	10	0	0	0
20150805	234	photoperiod	28	10	5.41667	10	1	1	0.1
20150805	235	dark	28	10	5.41667	10	0	0	0
20150805	235	light	28	10	5.41667	10	1	5	0.5
20150805	235	photoperiod	28	10	5.41667	7	0	1	0.142857
20150805	236	dark	28	10	5.41667	10	0	4	0.4
20150805	236	light	28	10	5.41667	10	0	3	0.3
20150805	236	photoperiod	28	10	5.41667	10	0	2	0.2
20150805	239	dark	28	10	5.41667	7	0	0	0
20150805	239	light	28	10	5.41667	7	0	0	0
20150805	239	photoperiod	28	10	5.41667	7	0	0	0
20150805	240	dark	28	10	5.41667	7	0	0	0
20150805	240	light	28	10	5.41667	7	0	0	0
20150805	240	photoperiod	28	10	5.41667	7	0	0	0
20150805	221	dark	30	12	5.5	10	3	3	0.3
20150805	221	light	30	12	5.5	10	0	0	0
20150805	221	photoperiod	30	12	5.5	10	0	3	0.3
20150805	222	dark	30	12	5.5	7	0	0	0
20150805	222	light	30	12	5.5	7	0	1	0.142857
20150805	222	photoperiod	30	12	5.5	7	0	0	0
20150805	230	dark	30	12	5.5	10	0	0	0
20150805	230	light	30	12	5.5	10	0	0	0
20150805	230	photoperiod	30	12	5.5	10	1	2	0.2
20150805	231	dark	30	12	5.5	10	0	0	0
20150805	231	light	30	12	5.5	10	0	0	0
20150805	231	photoperiod	30	12	5.5	10	0	0	0
20150805	232	dark	30	12	5.5	10	0	10	1
20150805	232	light	30	12	5.5	10	0	0	0
20150805	232	photoperiod	30	12	5.5	10	1	7	0.7
20150805	233	dark	30	12	5.5	10	3	8	0.8
20150805	233	light	30	12	5.5	10	0	0	0
20150805	233	photoperiod	30	12	5.5	10	0	2	0.2
20150805	234	dark	30	12	5.5	10	0	0	0
20150805	234	light	30	12	5.5	10	0	0	0
20150805	234	photoperiod	30	12	5.5	10	1	2	0.2
20150805	235	dark	30	12	5.5	10	0	0	0
20150805	235	light	30	12	5.5	10	0	5	0.5
20150805	235	photoperiod	30	12	5.5	7	0	1	0.142857
20150805	236	dark	30	12	5.5	10	2	6	0.6
20150805	236	light	30	12	5.5	10	0	3	0.3
20150805	236	photoperiod	30	12	5.5	10	1	3	0.3
20150805	239	dark	30	12	5.5	7	0	0	0
20150805	239	light	30	12	5.5	7	2	2	0.285714
20150805	239	photoperiod	30	12	5.5	7	0	0	0
20150805	240	dark	30	12	5.5	7	0	0	0
20150805	240	light	30	12	5.5	7	0	0	0
20150805	240	photoperiod	30	12	5.5	7	0	0	0
20150805	221	dark	32	14	5.58333	10	0	3	0.3
20150805	221	light	32	14	5.58333	10	3	3	0.3
20150805	221	photoperiod	32	14	5.58333	10	1	4	0.4
20150805	222	dark	32	14	5.58333	7	0	0	0
20150805	222	light	32	14	5.58333	7	1	2	0.285714
20150805	222	photoperiod	32	14	5.58333	7	0	0	0
20150805	230	dark	32	14	5.58333	10	0	0	0
20150805	230	light	32	14	5.58333	10	0	0	0
20150805	230	photoperiod	32	14	5.58333	10	0	2	0.2
20150805	231	dark	32	14	5.58333	10	0	0	0
20150805	231	light	32	14	5.58333	10	0	0	0
20150805	231	photoperiod	32	14	5.58333	10	0	0	0
20150805	232	dark	32	14	5.58333	10	0	10	1
20150805	232	light	32	14	5.58333	10	3	3	0.3
20150805	232	photoperiod	32	14	5.58333	10	0	7	0.7
20150805	233	dark	32	14	5.58333	10	1	9	0.9
20150805	233	light	32	14	5.58333	10	5	5	0.5
20150805	233	photoperiod	32	14	5.58333	10	3	5	0.5
20150805	234	dark	32	14	5.58333	10	0	0	0
20150805	234	light	32	14	5.58333	10	0	0	0
20150805	234	photoperiod	32	14	5.58333	10	1	3	0.3
20150805	235	dark	32	14	5.58333	10	0	0	0
20150805	235	light	32	14	5.58333	10	1	6	0.6
20150805	235	photoperiod	32	14	5.58333	7	0	1	0.142857
20150805	236	dark	32	14	5.58333	10	0	6	0.6
20150805	236	light	32	14	5.58333	10	2	5	0.5
20150805	236	photoperiod	32	14	5.58333	10	0	3	0.3
20150805	239	dark	32	14	5.58333	7	0	0	0
20150805	239	light	32	14	5.58333	7	0	2	0.285714
20150805	239	photoperiod	32	14	5.58333	7	1	1	0.142857
20150805	240	dark	32	14	5.58333	7	0	0	0
20150805	240	light	32	14	5.58333	7	0	0	0
20150805	240	photoperiod	32	14	5.58333	7	0	0	0
20150805	221	dark	34	16	5.66667	10	1	4	0.4
20150805	221	light	34	16	5.66667	10	0	3	0.3
20150805	221	photoperiod	34	16	5.66667	10	0	4	0.4
20150805	222	dark	34	16	5.66667	7	0	0	0
20150805	222	light	34	16	5.66667	7	0	2	0.285714
20150805	222	photoperiod	34	16	5.66667	7	0	0	0
20150805	230	dark	34	16	5.66667	10	0	0	0
20150805	230	light	34	16	5.66667	10	2	2	0.2
20150805	230	photoperiod	34	16	5.66667	10	1	3	0.3
20150805	231	dark	34	16	5.66667	10	0	0	0
20150805	231	light	34	16	5.66667	10	0	0	0
20150805	231	photoperiod	34	16	5.66667	10	0	0	0
20150805	232	dark	34	16	5.66667	10	0	10	1
20150805	232	light	34	16	5.66667	10	1	4	0.4
20150805	232	photoperiod	34	16	5.66667	10	0	7	0.7
20150805	233	dark	34	16	5.66667	10	1	10	1
20150805	233	light	34	16	5.66667	10	1	6	0.6
20150805	233	photoperiod	34	16	5.66667	10	1	6	0.6
20150805	234	dark	34	16	5.66667	10	0	0	0
20150805	234	light	34	16	5.66667	10	0	0	0
20150805	234	photoperiod	34	16	5.66667	10	0	3	0.3
20150805	235	dark	34	16	5.66667	10	0	0	0
20150805	235	light	34	16	5.66667	10	0	6	0.6
20150805	235	photoperiod	34	16	5.66667	7	0	1	0.142857
20150805	236	dark	34	16	5.66667	10	0	6	0.6
20150805	236	light	34	16	5.66667	10	1	6	0.6
20150805	236	photoperiod	34	16	5.66667	10	0	3	0.3
20150805	239	dark	34	16	5.66667	7	0	0	0
20150805	239	light	34	16	5.66667	7	0	2	0.285714
20150805	239	photoperiod	34	16	5.66667	7	0	1	0.142857
20150805	240	dark	34	16	5.66667	7	7	7	1
20150805	240	light	34	16	5.66667	7	1	1	0.142857
20150805	240	photoperiod	34	16	5.66667	7	0	0	0
20150805	221	dark	36	18	5.75	10	1	5	0.5
20150805	221	light	36	18	5.75	10	2	5	0.5
20150805	221	photoperiod	36	18	5.75	10	0	4	0.4
20150805	222	dark	36	18	5.75	7	0	0	0
20150805	222	light	36	18	5.75	7	0	2	0.285714
20150805	222	photoperiod	36	18	5.75	7	2	2	0.285714
20150805	230	dark	36	18	5.75	10	0	0	0
20150805	230	light	36	18	5.75	10	0	2	0.2
20150805	230	photoperiod	36	18	5.75	10	5	8	0.8
20150805	231	dark	36	18	5.75	10	0	0	0
20150805	231	light	36	18	5.75	10	2	2	0.2
20150805	231	photoperiod	36	18	5.75	10	0	0	0
20150805	232	dark	36	18	5.75	10	0	10	1
20150805	232	light	36	18	5.75	10	4	8	0.8
20150805	232	photoperiod	36	18	5.75	10	2	9	0.9
20150805	233	dark	36	18	5.75	10	0	10	1
20150805	233	light	36	18	5.75	10	0	6	0.6
20150805	233	photoperiod	36	18	5.75	10	0	6	0.6
20150805	234	dark	36	18	5.75	10	0	0	0
20150805	234	light	36	18	5.75	10	0	0	0
20150805	234	photoperiod	36	18	5.75	10	0	3	0.3
20150805	235	dark	36	18	5.75	10	4	4	0.4
20150805	235	light	36	18	5.75	10	2	8	0.8
20150805	235	photoperiod	36	18	5.75	7	0	1	0.142857
20150805	236	dark	36	18	5.75	10	2	8	0.8
20150805	236	light	36	18	5.75	10	1	7	0.7
20150805	236	photoperiod	36	18	5.75	10	0	3	0.3
20150805	239	dark	36	18	5.75	7	1	1	0.142857
20150805	239	light	36	18	5.75	7	1	3	0.428571
20150805	239	photoperiod	36	18	5.75	7	6	7	1
20150805	240	dark	36	18	5.75	7	0	7	1
20150805	240	light	36	18	5.75	7	2	3	0.428571
20150805	240	photoperiod	36	18	5.75	7	1	1	0.142857
20150805	221	dark	38	20	5.83333	10	1	6	0.6
20150805	221	light	38	20	5.83333	10	1	6	0.6
20150805	221	photoperiod	38	20	5.83333	10	5	9	0.9
20150805	222	dark	38	20	5.83333	7	1	1	0.142857
20150805	222	light	38	20	5.83333	7	1	3	0.428571
20150805	222	photoperiod	38	20	5.83333	7	5	7	1
20150805	230	dark	38	20	5.83333	10	0	0	0
20150805	230	light	38	20	5.83333	10	0	2	0.2
20150805	230	photoperiod	38	20	5.83333	10	2	10	1
20150805	231	dark	38	20	5.83333	10	0	0	0
20150805	231	light	38	20	5.83333	10	1	3	0.3
20150805	231	photoperiod	38	20	5.83333	10	8	8	0.8
20150805	232	dark	38	20	5.83333	10	0	10	1
20150805	232	light	38	20	5.83333	10	0	8	0.8
20150805	232	photoperiod	38	20	5.83333	10	1	10	1
20150805	233	dark	38	20	5.83333	10	0	10	1
20150805	233	light	38	20	5.83333	10	0	6	0.6
20150805	233	photoperiod	38	20	5.83333	10	4	10	1
20150805	234	dark	38	20	5.83333	10	1	1	0.1
20150805	234	light	38	20	5.83333	10	0	0	0
20150805	234	photoperiod	38	20	5.83333	10	7	10	1
20150805	235	dark	38	20	5.83333	10	4	8	0.8
20150805	235	light	38	20	5.83333	10	0	8	0.8
20150805	235	photoperiod	38	20	5.83333	7	6	7	1
20150805	236	dark	38	20	5.83333	10	0	8	0.8
20150805	236	light	38	20	5.83333	10	1	8	0.8
20150805	236	photoperiod	38	20	5.83333	10	7	10	1
20150805	239	dark	38	20	5.83333	7	0	1	0.142857
20150805	239	light	38	20	5.83333	7	0	3	0.428571
20150805	239	photoperiod	38	20	5.83333	7	0	7	1
20150805	240	dark	38	20	5.83333	7	0	7	1
20150805	240	light	38	20	5.83333	7	3	6	0.857143
20150805	240	photoperiod	38	20	5.83333	7	6	7	1
20150805	221	dark	40	22	5.91667	10	0	6	0.6
20150805	221	light	40	22	5.91667	10	1	7	0.7
20150805	221	photoperiod	40	22	5.91667	10	0	9	0.9
20150805	222	dark	40	22	5.91667	7	0	1	0.142857
20150805	222	light	40	22	5.91667	7	0	3	0.428571
20150805	222	photoperiod	40	22	5.91667	7	0	7	1
20150805	230	dark	40	22	5.91667	10	2	2	0.2
20150805	230	light	40	22	5.91667	10	0	2	0.2
20150805	230	photoperiod	40	22	5.91667	10	0	10	1
20150805	231	dark	40	22	5.91667	10	0	0	0
20150805	231	light	40	22	5.91667	10	2	5	0.5
20150805	231	photoperiod	40	22	5.91667	10	0	8	0.8
20150805	232	dark	40	22	5.91667	10	0	10	1
20150805	232	light	40	22	5.91667	10	0	8	0.8
20150805	232	photoperiod	40	22	5.91667	10	0	10	1
20150805	233	dark	40	22	5.91667	10	0	10	1
20150805	233	light	40	22	5.91667	10	2	8	0.8
20150805	233	photoperiod	40	22	5.91667	10	0	10	1
20150805	234	dark	40	22	5.91667	10	7	8	0.8
20150805	234	light	40	22	5.91667	10	0	0	0
20150805	234	photoperiod	40	22	5.91667	10	0	10	1
20150805	235	dark	40	22	5.91667	10	0	8	0.8
20150805	235	light	40	22	5.91667	10	0	8	0.8
20150805	235	photoperiod	40	22	5.91667	7	0	7	1
20150805	236	dark	40	22	5.91667	10	1	9	0.9
20150805	236	light	40	22	5.91667	10	0	8	0.8
20150805	236	photoperiod	40	22	5.91667	10	0	10	1
20150805	239	dark	40	22	5.91667	7	0	1	0.142857
20150805	239	light	40	22	5.91667	7	0	3	0.428571
20150805	239	photoperiod	40	22	5.91667	7	0	7	1
20150805	240	dark	40	22	5.91667	7	0	7	1
20150805	240	light	40	22	5.91667	7	0	6	0.857143
20150805	240	photoperiod	40	22	5.91667	7	0	7	1
20150806	221	dark	42	0	6	10	4	10	1
20150806	221	light	42	0	6	10	3	10	1
20150806	221	photoperiod	42	0	6	10	0	9	0.9
20150806	222	dark	42	0	6	7	6	7	1
20150806	222	light	42	0	6	7	0	3	0.428571
20150806	222	photoperiod	42	0	6	7	0	7	1
20150806	230	dark	42	0	6	10	7	9	0.9
20150806	230	light	42	0	6	10	5	7	0.7
20150806	230	photoperiod	42	0	6	10	0	10	1
20150806	231	dark	42	0	6	10	6	6	0.6
20150806	231	light	42	0	6	10	0	5	0.5
20150806	231	photoperiod	42	0	6	10	0	8	0.8
20150806	232	dark	42	0	6	10	0	10	1
20150806	232	light	42	0	6	10	0	8	0.8
20150806	232	photoperiod	42	0	6	10	0	10	1
20150806	233	dark	42	0	6	10	0	10	1
20150806	233	light	42	0	6	10	2	10	1
20150806	233	photoperiod	42	0	6	10	0	10	1
20150806	234	dark	42	0	6	10	0	8	0.8
20150806	234	light	42	0	6	10	0	0	0
20150806	234	photoperiod	42	0	6	10	0	10	1
20150806	235	dark	42	0	6	10	2	10	1
20150806	235	light	42	0	6	10	0	8	0.8
20150806	235	photoperiod	42	0	6	7	0	7	1
20150806	236	dark	42	0	6	10	1	10	1
20150806	236	light	42	0	6	10	0	8	0.8
20150806	236	photoperiod	42	0	6	10	0	10	1
20150806	239	dark	42	0	6	7	3	4	0.571429
20150806	239	light	42	0	6	7	0	3	0.428571
20150806	239	photoperiod	42	0	6	7	0	7	1
20150806	240	dark	42	0	6	7	0	7	1
20150806	240	light	42	0	6	7	0	6	0.857143
20150806	240	photoperiod	42	0	6	7	0	7	1
20150806	221	dark	44	2	6.08333	10	0	10	1
20150806	221	light	44	2	6.08333	10	0	10	1
20150806	221	photoperiod	44	2	6.08333	10	0	9	0.9
20150806	222	dark	44	2	6.08333	7	0	7	1
20150806	222	light	44	2	6.08333	7	0	3	0.428571
20150806	222	photoperiod	44	2	6.08333	7	0	7	1
20150806	230	dark	44	2	6.08333	10	0	9	0.9
20150806	230	light	44	2	6.08333	10	0	7	0.7
20150806	230	photoperiod	44	2	6.08333	10	0	10	1
20150806	231	dark	44	2	6.08333	10	0	6	0.6
20150806	231	light	44	2	6.08333	10	0	5	0.5
20150806	231	photoperiod	44	2	6.08333	10	1	9	0.9
20150806	232	dark	44	2	6.08333	10	0	10	1
20150806	232	light	44	2	6.08333	10	0	8	0.8
20150806	232	photoperiod	44	2	6.08333	10	0	10	1
20150806	233	dark	44	2	6.08333	10	0	10	1
20150806	233	light	44	2	6.08333	10	0	10	1
20150806	233	photoperiod	44	2	6.08333	10	0	10	1
20150806	234	dark	44	2	6.08333	10	1	9	0.9
20150806	234	light	44	2	6.08333	10	0	0	0
20150806	234	photoperiod	44	2	6.08333	10	0	10	1
20150806	235	dark	44	2	6.08333	10	0	10	1
20150806	235	light	44	2	6.08333	10	0	8	0.8
20150806	235	photoperiod	44	2	6.08333	7	0	7	1
20150806	236	dark	44	2	6.08333	10	0	10	1
20150806	236	light	44	2	6.08333	10	2	10	1
20150806	236	photoperiod	44	2	6.08333	10	0	10	1
20150806	239	dark	44	2	6.08333	7	1	5	0.714286
20150806	239	light	44	2	6.08333	7	3	6	0.857143
20150806	239	photoperiod	44	2	6.08333	7	0	7	1
20150806	240	dark	44	2	6.08333	7	0	7	1
20150806	240	light	44	2	6.08333	7	0	6	0.857143
20150806	240	photoperiod	44	2	6.08333	7	0	7	1
20150806	221	dark	46	4	6.16667	10	0	10	1
20150806	221	light	46	4	6.16667	10	0	10	1
20150806	221	photoperiod	46	4	6.16667	10	0	9	0.9
20150806	222	dark	46	4	6.16667	7	0	7	1
20150806	222	light	46	4	6.16667	7	4	7	1
20150806	222	photoperiod	46	4	6.16667	7	0	7	1
20150806	230	dark	46	4	6.16667	10	1	10	1
20150806	230	light	46	4	6.16667	10	1	8	0.8
20150806	230	photoperiod	46	4	6.16667	10	0	10	1
20150806	231	dark	46	4	6.16667	10	0	6	0.6
20150806	231	light	46	4	6.16667	10	0	5	0.5
20150806	231	photoperiod	46	4	6.16667	10	0	9	0.9
20150806	232	dark	46	4	6.16667	10	0	10	1
20150806	232	light	46	4	6.16667	10	0	8	0.8
20150806	232	photoperiod	46	4	6.16667	10	0	10	1
20150806	233	dark	46	4	6.16667	10	0	10	1
20150806	233	light	46	4	6.16667	10	0	10	1
20150806	233	photoperiod	46	4	6.16667	10	0	10	1
20150806	234	dark	46	4	6.16667	10	0	9	0.9
20150806	234	light	46	4	6.16667	10	4	4	0.4
20150806	234	photoperiod	46	4	6.16667	10	0	10	1
20150806	235	dark	46	4	6.16667	10	0	10	1
20150806	235	light	46	4	6.16667	10	0	8	0.8
20150806	235	photoperiod	46	4	6.16667	7	0	7	1
20150806	236	dark	46	4	6.16667	10	0	10	1
20150806	236	light	46	4	6.16667	10	0	10	1
20150806	236	photoperiod	46	4	6.16667	10	0	10	1
20150806	239	dark	46	4	6.16667	7	0	5	0.714286
20150806	239	light	46	4	6.16667	7	0	6	0.857143
20150806	239	photoperiod	46	4	6.16667	7	0	7	1
20150806	240	dark	46	4	6.16667	7	0	7	1
20150806	240	light	46	4	6.16667	7	1	7	1
20150806	240	photoperiod	46	4	6.16667	7	0	7	1
20150806	221	dark	48	6	6.25	10	0	10	1
20150806	221	light	48	6	6.25	10	0	10	1
20150806	221	photoperiod	48	6	6.25	10	0	9	0.9
20150806	222	dark	48	6	6.25	7	0	7	1
20150806	222	light	48	6	6.25	7	0	7	1
20150806	222	photoperiod	48	6	6.25	7	0	7	1
20150806	230	dark	48	6	6.25	10	0	10	1
20150806	230	light	48	6	6.25	10	1	9	0.9
20150806	230	photoperiod	48	6	6.25	10	0	10	1
20150806	231	dark	48	6	6.25	10	1	7	0.7
20150806	231	light	48	6	6.25	10	1	6	0.6
20150806	231	photoperiod	48	6	6.25	10	1	10	1
20150806	232	dark	48	6	6.25	10	0	10	1
20150806	232	light	48	6	6.25	10	0	8	0.8
20150806	232	photoperiod	48	6	6.25	10	0	10	1
20150806	233	dark	48	6	6.25	10	0	10	1
20150806	233	light	48	6	6.25	10	0	10	1
20150806	233	photoperiod	48	6	6.25	10	0	10	1
20150806	234	dark	48	6	6.25	10	0	9	0.9
20150806	234	light	48	6	6.25	10	0	4	0.4
20150806	234	photoperiod	48	6	6.25	10	0	10	1
20150806	235	dark	48	6	6.25	10	0	10	1
20150806	235	light	48	6	6.25	10	1	9	0.9
20150806	235	photoperiod	48	6	6.25	7	0	7	1
20150806	236	dark	48	6	6.25	10	0	10	1
20150806	236	light	48	6	6.25	10	0	10	1
20150806	236	photoperiod	48	6	6.25	10	0	10	1
20150806	239	dark	48	6	6.25	7	0	5	0.714286
20150806	239	light	48	6	6.25	7	0	6	0.857143
20150806	239	photoperiod	48	6	6.25	7	0	7	1
20150806	240	dark	48	6	6.25	7	0	7	1
20150806	240	light	48	6	6.25	7	0	7	1
20150806	240	photoperiod	48	6	6.25	7	0	7	1
20150806	221	dark	50	8	6.33333	10	0	10	1
20150806	221	light	50	8	6.33333	10	0	10	1
20150806	221	photoperiod	50	8	6.33333	10	1	10	1
20150806	222	dark	50	8	6.33333	7	0	7	1
20150806	222	light	50	8	6.33333	7	0	7	1
20150806	222	photoperiod	50	8	6.33333	7	0	7	1
20150806	230	dark	50	8	6.33333	10	0	10	1
20150806	230	light	50	8	6.33333	10	0	9	0.9
20150806	230	photoperiod	50	8	6.33333	10	0	10	1
20150806	231	dark	50	8	6.33333	10	1	8	0.8
20150806	231	light	50	8	6.33333	10	0	6	0.6
20150806	231	photoperiod	50	8	6.33333	10	0	10	1
20150806	232	dark	50	8	6.33333	10	0	10	1
20150806	232	light	50	8	6.33333	10	0	8	0.8
20150806	232	photoperiod	50	8	6.33333	10	0	10	1
20150806	233	dark	50	8	6.33333	10	0	10	1
20150806	233	light	50	8	6.33333	10	0	10	1
20150806	233	photoperiod	50	8	6.33333	10	0	10	1
20150806	234	dark	50	8	6.33333	10	1	10	1
20150806	234	light	50	8	6.33333	10	0	4	0.4
20150806	234	photoperiod	50	8	6.33333	10	0	10	1
20150806	235	dark	50	8	6.33333	10	0	10	1
20150806	235	light	50	8	6.33333	10	0	9	0.9
20150806	235	photoperiod	50	8	6.33333	7	0	7	1
20150806	236	dark	50	8	6.33333	10	0	10	1
20150806	236	light	50	8	6.33333	10	0	10	1
20150806	236	photoperiod	50	8	6.33333	10	0	10	1
20150806	239	dark	50	8	6.33333	7	1	6	0.857143
20150806	239	light	50	8	6.33333	7	0	6	0.857143
20150806	239	photoperiod	50	8	6.33333	7	0	7	1
20150806	240	dark	50	8	6.33333	7	0	7	1
20150806	240	light	50	8	6.33333	7	0	7	1
20150806	240	photoperiod	50	8	6.33333	7	0	7	1
20150806	221	dark	52	10	6.41667	10	0	10	1
20150806	221	light	52	10	6.41667	10	0	10	1
20150806	221	photoperiod	52	10	6.41667	10	0	10	1
20150806	222	dark	52	10	6.41667	7	0	7	1
20150806	222	light	52	10	6.41667	7	0	7	1
20150806	222	photoperiod	52	10	6.41667	7	0	7	1
20150806	230	dark	52	10	6.41667	10	0	10	1
20150806	230	light	52	10	6.41667	10	1	10	1
20150806	230	photoperiod	52	10	6.41667	10	0	10	1
20150806	231	dark	52	10	6.41667	10	0	8	0.8
20150806	231	light	52	10	6.41667	10	0	6	0.6
20150806	231	photoperiod	52	10	6.41667	10	0	10	1
20150806	232	dark	52	10	6.41667	10	0	10	1
20150806	232	light	52	10	6.41667	10	0	8	0.8
20150806	232	photoperiod	52	10	6.41667	10	0	10	1
20150806	233	dark	52	10	6.41667	10	0	10	1
20150806	233	light	52	10	6.41667	10	0	10	1
20150806	233	photoperiod	52	10	6.41667	10	0	10	1
20150806	234	dark	52	10	6.41667	10	0	10	1
20150806	234	light	52	10	6.41667	10	0	4	0.4
20150806	234	photoperiod	52	10	6.41667	10	0	10	1
20150806	235	dark	52	10	6.41667	10	0	10	1
20150806	235	light	52	10	6.41667	10	1	10	1
20150806	235	photoperiod	52	10	6.41667	7	0	7	1
20150806	236	dark	52	10	6.41667	10	0	10	1
20150806	236	light	52	10	6.41667	10	0	10	1
20150806	236	photoperiod	52	10	6.41667	10	0	10	1
20150806	239	dark	52	10	6.41667	7	0	6	0.857143
20150806	239	light	52	10	6.41667	7	0	6	0.857143
20150806	239	photoperiod	52	10	6.41667	7	0	7	1
20150806	240	dark	52	10	6.41667	7	0	7	1
20150806	240	light	52	10	6.41667	7	0	7	1
20150806	240	photoperiod	52	10	6.41667	7	0	7	1
20150806	221	dark	54	12	6.5	10	0	10	1
20150806	221	light	54	12	6.5	10	0	10	1
20150806	221	photoperiod	54	12	6.5	10	0	10	1
20150806	222	dark	54	12	6.5	7	0	7	1
20150806	222	light	54	12	6.5	7	0	7	1
20150806	222	photoperiod	54	12	6.5	7	0	7	1
20150806	230	dark	54	12	6.5	10	0	10	1
20150806	230	light	54	12	6.5	10	0	10	1
20150806	230	photoperiod	54	12	6.5	10	0	10	1
20150806	231	dark	54	12	6.5	10	0	8	0.8
20150806	231	light	54	12	6.5	10	0	6	0.6
20150806	231	photoperiod	54	12	6.5	10	0	10	1
20150806	232	dark	54	12	6.5	10	0	10	1
20150806	232	light	54	12	6.5	10	0	8	0.8
20150806	232	photoperiod	54	12	6.5	10	0	10	1
20150806	233	dark	54	12	6.5	10	0	10	1
20150806	233	light	54	12	6.5	10	0	10	1
20150806	233	photoperiod	54	12	6.5	10	0	10	1
20150806	234	dark	54	12	6.5	10	0	10	1
20150806	234	light	54	12	6.5	10	2	6	0.6
20150806	234	photoperiod	54	12	6.5	10	0	10	1
20150806	235	dark	54	12	6.5	10	0	10	1
20150806	235	light	54	12	6.5	10	0	10	1
20150806	235	photoperiod	54	12	6.5	7	0	7	1
20150806	236	dark	54	12	6.5	10	0	10	1
20150806	236	light	54	12	6.5	10	0	10	1
20150806	236	photoperiod	54	12	6.5	10	0	10	1
20150806	239	dark	54	12	6.5	7	1	7	1
20150806	239	light	54	12	6.5	7	0	6	0.857143
20150806	239	photoperiod	54	12	6.5	7	0	7	1
20150806	240	dark	54	12	6.5	7	0	7	1
20150806	240	light	54	12	6.5	7	0	7	1
20150806	240	photoperiod	54	12	6.5	7	0	7	1
20150806	221	dark	56	14	6.58333	10	0	10	1
20150806	221	light	56	14	6.58333	10	0	10	1
20150806	221	photoperiod	56	14	6.58333	10	0	10	1
20150806	222	dark	56	14	6.58333	7	0	7	1
20150806	222	light	56	14	6.58333	7	0	7	1
20150806	222	photoperiod	56	14	6.58333	7	0	7	1
20150806	230	dark	56	14	6.58333	10	0	10	1
20150806	230	light	56	14	6.58333	10	0	10	1
20150806	230	photoperiod	56	14	6.58333	10	0	10	1
20150806	231	dark	56	14	6.58333	10	0	8	0.8
20150806	231	light	56	14	6.58333	10	1	7	0.7
20150806	231	photoperiod	56	14	6.58333	10	0	10	1
20150806	232	dark	56	14	6.58333	10	0	10	1
20150806	232	light	56	14	6.58333	10	1	9	0.9
20150806	232	photoperiod	56	14	6.58333	10	0	10	1
20150806	233	dark	56	14	6.58333	10	0	10	1
20150806	233	light	56	14	6.58333	10	0	10	1
20150806	233	photoperiod	56	14	6.58333	10	0	10	1
20150806	234	dark	56	14	6.58333	10	0	10	1
20150806	234	light	56	14	6.58333	10	0	6	0.6
20150806	234	photoperiod	56	14	6.58333	10	0	10	1
20150806	235	dark	56	14	6.58333	10	0	10	1
20150806	235	light	56	14	6.58333	10	0	10	1
20150806	235	photoperiod	56	14	6.58333	7	0	7	1
20150806	236	dark	56	14	6.58333	10	0	10	1
20150806	236	light	56	14	6.58333	10	0	10	1
20150806	236	photoperiod	56	14	6.58333	10	0	10	1
20150806	239	dark	56	14	6.58333	7	0	7	1
20150806	239	light	56	14	6.58333	7	0	6	0.857143
20150806	239	photoperiod	56	14	6.58333	7	0	7	1
20150806	240	dark	56	14	6.58333	7	0	7	1
20150806	240	light	56	14	6.58333	7	0	7	1
20150806	240	photoperiod	56	14	6.58333	7	0	7	1
20150806	221	dark	58	16	6.66667	10	0	10	1
20150806	221	light	58	16	6.66667	10	0	10	1
20150806	221	photoperiod	58	16	6.66667	10	0	10	1
20150806	222	dark	58	16	6.66667	7	0	7	1
20150806	222	light	58	16	6.66667	7	0	7	1
20150806	222	photoperiod	58	16	6.66667	7	0	7	1
20150806	230	dark	58	16	6.66667	10	0	10	1
20150806	230	light	58	16	6.66667	10	0	10	1
20150806	230	photoperiod	58	16	6.66667	10	0	10	1
20150806	231	dark	58	16	6.66667	10	0	8	0.8
20150806	231	light	58	16	6.66667	10	1	8	0.8
20150806	231	photoperiod	58	16	6.66667	10	0	10	1
20150806	232	dark	58	16	6.66667	10	0	10	1
20150806	232	light	58	16	6.66667	10	0	9	0.9
20150806	232	photoperiod	58	16	6.66667	10	0	10	1
20150806	233	dark	58	16	6.66667	10	0	10	1
20150806	233	light	58	16	6.66667	10	0	10	1
20150806	233	photoperiod	58	16	6.66667	10	0	10	1
20150806	234	dark	58	16	6.66667	10	0	10	1
20150806	234	light	58	16	6.66667	10	1	7	0.7
20150806	234	photoperiod	58	16	6.66667	10	0	10	1
20150806	235	dark	58	16	6.66667	10	0	10	1
20150806	235	light	58	16	6.66667	10	0	10	1
20150806	235	photoperiod	58	16	6.66667	7	0	7	1
20150806	236	dark	58	16	6.66667	10	0	10	1
20150806	236	light	58	16	6.66667	10	0	10	1
20150806	236	photoperiod	58	16	6.66667	10	0	10	1
20150806	239	dark	58	16	6.66667	7	0	7	1
20150806	239	light	58	16	6.66667	7	0	6	0.857143
20150806	239	photoperiod	58	16	6.66667	7	0	7	1
20150806	240	dark	58	16	6.66667	7	0	7	1
20150806	240	light	58	16	6.66667	7	0	7	1
20150806	240	photoperiod	58	16	6.66667	7	0	7	1
20150806	221	dark	60	18	6.75	10	0	10	1
20150806	221	light	60	18	6.75	10	0	10	1
20150806	221	photoperiod	60	18	6.75	10	0	10	1
20150806	222	dark	60	18	6.75	7	0	7	1
20150806	222	light	60	18	6.75	7	0	7	1
20150806	222	photoperiod	60	18	6.75	7	0	7	1
20150806	230	dark	60	18	6.75	10	0	10	1
20150806	230	light	60	18	6.75	10	0	10	1
20150806	230	photoperiod	60	18	6.75	10	0	10	1
20150806	231	dark	60	18	6.75	10	0	8	0.8
20150806	231	light	60	18	6.75	10	0	8	0.8
20150806	231	photoperiod	60	18	6.75	10	0	10	1
20150806	232	dark	60	18	6.75	10	0	10	1
20150806	232	light	60	18	6.75	10	0	9	0.9
20150806	232	photoperiod	60	18	6.75	10	0	10	1
20150806	233	dark	60	18	6.75	10	0	10	1
20150806	233	light	60	18	6.75	10	0	10	1
20150806	233	photoperiod	60	18	6.75	10	0	10	1
20150806	234	dark	60	18	6.75	10	0	10	1
20150806	234	light	60	18	6.75	10	0	7	0.7
20150806	234	photoperiod	60	18	6.75	10	0	10	1
20150806	235	dark	60	18	6.75	10	0	10	1
20150806	235	light	60	18	6.75	10	0	10	1
20150806	235	photoperiod	60	18	6.75	7	0	7	1
20150806	236	dark	60	18	6.75	10	0	10	1
20150806	236	light	60	18	6.75	10	0	10	1
20150806	236	photoperiod	60	18	6.75	10	0	10	1
20150806	239	dark	60	18	6.75	7	0	7	1
20150806	239	light	60	18	6.75	7	0	6	0.857143
20150806	239	photoperiod	60	18	6.75	7	0	7	1
20150806	240	dark	60	18	6.75	7	0	7	1
20150806	240	light	60	18	6.75	7	0	7	1
20150806	240	photoperiod	60	18	6.75	7	0	7	1
20150806	221	dark	62	20	6.83333	10	0	10	1
20150806	221	light	62	20	6.83333	10	0	10	1
20150806	221	photoperiod	62	20	6.83333	10	0	10	1
20150806	222	dark	62	20	6.83333	7	0	7	1
20150806	222	light	62	20	6.83333	7	0	7	1
20150806	222	photoperiod	62	20	6.83333	7	0	7	1
20150806	230	dark	62	20	6.83333	10	0	10	1
20150806	230	light	62	20	6.83333	10	0	10	1
20150806	230	photoperiod	62	20	6.83333	10	0	10	1
20150806	231	dark	62	20	6.83333	10	0	8	0.8
20150806	231	light	62	20	6.83333	10	2	10	1
20150806	231	photoperiod	62	20	6.83333	10	0	10	1
20150806	232	dark	62	20	6.83333	10	0	10	1
20150806	232	light	62	20	6.83333	10	1	10	1
20150806	232	photoperiod	62	20	6.83333	10	0	10	1
20150806	233	dark	62	20	6.83333	10	0	10	1
20150806	233	light	62	20	6.83333	10	0	10	1
20150806	233	photoperiod	62	20	6.83333	10	0	10	1
20150806	234	dark	62	20	6.83333	10	0	10	1
20150806	234	light	62	20	6.83333	10	1	8	0.8
20150806	234	photoperiod	62	20	6.83333	10	0	10	1
20150806	235	dark	62	20	6.83333	10	0	10	1
20150806	235	light	62	20	6.83333	10	0	10	1
20150806	235	photoperiod	62	20	6.83333	7	0	7	1
20150806	236	dark	62	20	6.83333	10	0	10	1
20150806	236	light	62	20	6.83333	10	0	10	1
20150806	236	photoperiod	62	20	6.83333	10	0	10	1
20150806	239	dark	62	20	6.83333	7	0	7	1
20150806	239	light	62	20	6.83333	7	0	6	0.857143
20150806	239	photoperiod	62	20	6.83333	7	0	7	1
20150806	240	dark	62	20	6.83333	7	0	7	1
20150806	240	light	62	20	6.83333	7	0	7	1
20150806	240	photoperiod	62	20	6.83333	7	0	7	1
20150806	221	dark	64	22	6.91667	10	0	10	1
20150806	221	light	64	22	6.91667	10	0	10	1
20150806	221	photoperiod	64	22	6.91667	10	0	10	1
20150806	222	dark	64	22	6.91667	7	0	7	1
20150806	222	light	64	22	6.91667	7	0	7	1
20150806	222	photoperiod	64	22	6.91667	7	0	7	1
20150806	230	dark	64	22	6.91667	10	0	10	1
20150806	230	light	64	22	6.91667	10	0	10	1
20150806	230	photoperiod	64	22	6.91667	10	0	10	1
20150806	231	dark	64	22	6.91667	10	0	8	0.8
20150806	231	light	64	22	6.91667	10	0	10	1
20150806	231	photoperiod	64	22	6.91667	10	0	10	1
20150806	232	dark	64	22	6.91667	10	0	10	1
20150806	232	light	64	22	6.91667	10	0	10	1
20150806	232	photoperiod	64	22	6.91667	10	0	10	1
20150806	233	dark	64	22	6.91667	10	0	10	1
20150806	233	light	64	22	6.91667	10	0	10	1
20150806	233	photoperiod	64	22	6.91667	10	0	10	1
20150806	234	dark	64	22	6.91667	10	0	10	1
20150806	234	light	64	22	6.91667	10	1	9	0.9
20150806	234	photoperiod	64	22	6.91667	10	0	10	1
20150806	235	dark	64	22	6.91667	10	0	10	1
20150806	235	light	64	22	6.91667	10	0	10	1
20150806	235	photoperiod	64	22	6.91667	7	0	7	1
20150806	236	dark	64	22	6.91667	10	0	10	1
20150806	236	light	64	22	6.91667	10	0	10	1
20150806	236	photoperiod	64	22	6.91667	10	0	10	1
20150806	239	dark	64	22	6.91667	7	0	7	1
20150806	239	light	64	22	6.91667	7	0	6	0.857143
20150806	239	photoperiod	64	22	6.91667	7	0	7	1
20150806	240	dark	64	22	6.91667	7	0	7	1
20150806	240	light	64	22	6.91667	7	0	7	1
20150806	240	photoperiod	64	22	6.91667	7	0	7	1
20150807	221	dark	66	0	7	10	0	10	1
20150807	221	light	66	0	7	10	0	10	1
20150807	221	photoperiod	66	0	7	10	0	10	1
20150807	222	dark	66	0	7	7	0	7	1
20150807	222	light	66	0	7	7	0	7	1
20150807	222	photoperiod	66	0	7	7	0	7	1
20150807	230	dark	66	0	7	10	0	10	1
20150807	230	light	66	0	7	10	0	10	1
20150807	230	photoperiod	66	0	7	10	0	10	1
20150807	231	dark	66	0	7	10	0	8	0.8
20150807	231	light	66	0	7	10	0	10	1
20150807	231	photoperiod	66	0	7	10	0	10	1
20150807	232	dark	66	0	7	10	0	10	1
20150807	232	light	66	0	7	10	0	10	1
20150807	232	photoperiod	66	0	7	10	0	10	1
20150807	233	dark	66	0	7	10	0	10	1
20150807	233	light	66	0	7	10	0	10	1
20150807	233	photoperiod	66	0	7	10	0	10	1
20150807	234	dark	66	0	7	10	0	10	1
20150807	234	light	66	0	7	10	0	9	0.9
20150807	234	photoperiod	66	0	7	10	0	10	1
20150807	235	dark	66	0	7	10	0	10	1
20150807	235	light	66	0	7	10	0	10	1
20150807	235	photoperiod	66	0	7	7	0	7	1
20150807	236	dark	66	0	7	10	0	10	1
20150807	236	light	66	0	7	10	0	10	1
20150807	236	photoperiod	66	0	7	10	0	10	1
20150807	239	dark	66	0	7	7	0	7	1
20150807	239	light	66	0	7	7	0	6	0.857143
20150807	239	photoperiod	66	0	7	7	0	7	1
20150807	240	dark	66	0	7	7	0	7	1
20150807	240	light	66	0	7	7	0	7	1
20150807	240	photoperiod	66	0	7	7	0	7	1
20150807	221	dark	68	2	7.08333	10	0	10	1
20150807	221	light	68	2	7.08333	10	0	10	1
20150807	221	photoperiod	68	2	7.08333	10	0	10	1
20150807	222	dark	68	2	7.08333	7	0	7	1
20150807	222	light	68	2	7.08333	7	0	7	1
20150807	222	photoperiod	68	2	7.08333	7	0	7	1
20150807	230	dark	68	2	7.08333	10	0	10	1
20150807	230	light	68	2	7.08333	10	0	10	1
20150807	230	photoperiod	68	2	7.08333	10	0	10	1
20150807	231	dark	68	2	7.08333	10	1	9	0.9
20150807	231	light	68	2	7.08333	10	0	10	1
20150807	231	photoperiod	68	2	7.08333	10	0	10	1
20150807	232	dark	68	2	7.08333	10	0	10	1
20150807	232	light	68	2	7.08333	10	0	10	1
20150807	232	photoperiod	68	2	7.08333	10	0	10	1
20150807	233	dark	68	2	7.08333	10	0	10	1
20150807	233	light	68	2	7.08333	10	0	10	1
20150807	233	photoperiod	68	2	7.08333	10	0	10	1
20150807	234	dark	68	2	7.08333	10	0	10	1
20150807	234	light	68	2	7.08333	10	0	9	0.9
20150807	234	photoperiod	68	2	7.08333	10	0	10	1
20150807	235	dark	68	2	7.08333	10	0	10	1
20150807	235	light	68	2	7.08333	10	0	10	1
20150807	235	photoperiod	68	2	7.08333	7	0	7	1
20150807	236	dark	68	2	7.08333	10	0	10	1
20150807	236	light	68	2	7.08333	10	0	10	1
20150807	236	photoperiod	68	2	7.08333	10	0	10	1
20150807	239	dark	68	2	7.08333	7	0	7	1
20150807	239	light	68	2	7.08333	7	1	7	1
20150807	239	photoperiod	68	2	7.08333	7	0	7	1
20150807	240	dark	68	2	7.08333	7	0	7	1
20150807	240	light	68	2	7.08333	7	0	7	1
20150807	240	photoperiod	68	2	7.08333	7	0	7	1
20150807	221	dark	70	4	7.16667	10	0	10	1
20150807	221	light	70	4	7.16667	10	0	10	1
20150807	221	photoperiod	70	4	7.16667	10	0	10	1
20150807	222	dark	70	4	7.16667	7	0	7	1
20150807	222	light	70	4	7.16667	7	0	7	1
20150807	222	photoperiod	70	4	7.16667	7	0	7	1
20150807	230	dark	70	4	7.16667	10	0	10	1
20150807	230	light	70	4	7.16667	10	0	10	1
20150807	230	photoperiod	70	4	7.16667	10	0	10	1
20150807	231	dark	70	4	7.16667	10	1	10	1
20150807	231	light	70	4	7.16667	10	0	10	1
20150807	231	photoperiod	70	4	7.16667	10	0	10	1
20150807	232	dark	70	4	7.16667	10	0	10	1
20150807	232	light	70	4	7.16667	10	0	10	1
20150807	232	photoperiod	70	4	7.16667	10	0	10	1
20150807	233	dark	70	4	7.16667	10	0	10	1
20150807	233	light	70	4	7.16667	10	0	10	1
20150807	233	photoperiod	70	4	7.16667	10	0	10	1
20150807	234	dark	70	4	7.16667	10	0	10	1
20150807	234	light	70	4	7.16667	10	1	10	1
20150807	234	photoperiod	70	4	7.16667	10	0	10	1
20150807	235	dark	70	4	7.16667	10	0	10	1
20150807	235	light	70	4	7.16667	10	0	10	1
20150807	235	photoperiod	70	4	7.16667	7	0	7	1
20150807	236	dark	70	4	7.16667	10	0	10	1
20150807	236	light	70	4	7.16667	10	0	10	1
20150807	236	photoperiod	70	4	7.16667	10	0	10	1
20150807	239	dark	70	4	7.16667	7	0	7	1
20150807	239	light	70	4	7.16667	7	0	7	1
20150807	239	photoperiod	70	4	7.16667	7	0	7	1
20150807	240	dark	70	4	7.16667	7	0	7	1
20150807	240	light	70	4	7.16667	7	0	7	1
20150807	240	photoperiod	70	4	7.16667	7	0	7	1
