# Supplementary material for: When and where to hatch? Red-eyed treefrog embryos use light cues in two contexts
Source: PeerJ. 2018 Dec 3;6:e6018. doi: 10.7717/peerj.6018 (PMC6283037; doi:10.7717/peerj.6018)
Supplement: Supplemental Information 2 [file peerj-06-6018-s002.xlsx]

## Sheet: Hatching Orientation
Date	Trial#	Condition	Clutch	StartTime	SetupFromSide	HatchingTime-min	HatchingDirection
20150705	1	HalfDark	89	2:05pm		10.68	light
20150705	2	HalfDark	89	2:20pm		8.35	light
20150705	3	HalfDark	90	2:33pm		8.6	light
20150705	4	HalfDark	90	2:47pm		11.85	light
20150705	5	HalfDark	84	3:05pm		10.9	dark
20150705	7	HalfDark	91	3:45pm		24.8	dark
20150705	8	HalfDark	91	4:14pm		19.02	light
20150705	9	HalfDark	85	4:37pm		4.53	light
20150705	10	HalfDark	85	4:45pm		7.25	light
20150706	11	HalfDark	95	2:31pm		9.8	dark
20150706	12	HalfDark	95	2:47pm		7.28	light
20150706	13	HalfDark	96	2:58pm		10.57	dark
20150706	14	HalfDark	96	3:13pm		5.02	light
20150706	15	HalfDark	97	3:25pm		3.83	light
20150706	16	HalfDark	97	3:33pm		8.33	light
20150706	17	HalfDark	98	3:46pm		5.32	light
20150706	18	HalfDark	98	3:56pm		5.18	light
20150706	19	HalfDark	99	4:13pm		6.6	dark
20150710	21	HalfDark	101	1:58pm	light	8.17	dark
20150710	22	HalfDark	101	2:10pm	dark	30.45	dark
20150710	23	HalfDark	102	2:45pm	light	9.18	light
20150710	24	HalfDark	102	2:58pm	dark	29.68	light
20150710	25	HalfDark	103	3:33pm	light	13.15	dark
20150710	26	HalfDark	103	3:50pm	dark	9.47	dark
20150710	28	HalfDark	105	4:09pm	dark	13.13	light
20150710	29	HalfDark	106	4:27pm	light	3.07	light
20150710	30	HalfDark	106	4:34pm	dark	37.67	light
20150711	31	HalfDark	121	1:50pm	light	11.08	light
20150711	32	HalfDark	121	2:04pm	dark	15.17	light
20150711	33	HalfDark	122	2:24pm	light	14.2	dark
20150711	34	HalfDark	122	2:43pm	dark	9.78	dark
20150711	36	HalfDark	118	3:02pm	dark	8.07	dark
20150711	37	HalfDark	119	3:15pm	light	12.92	light
20150711	38	HalfDark	119	3:31pm	dark	7.52	light
20150711	39	HalfDark	120	3:44pm	light	17.65	dark
20150711	40	HalfDark	120	4:05pm	dark	17.03	light
20150712	41	HalfDark	132	2:10pm	light	11.07	light
20150712	43	HalfDark	133	2:31pm	light	5.82	light
20150712	44	HalfDark	133	2:40pm	dark	9.2	light
20150712	45	HalfDark	134	3:00pm	light	29.07	light
20150712	46	HalfDark	134	3:37pm	dark	38.87	dark
20150712	47	HalfDark	136	4:20pm	light	21.07	dark
20150712	48	HalfDark	136	4:45pm	dark	5.8	light
20150712	49	HalfDark	135	4:55pm	light	19.75	light
20150712	50	HalfDark	135	5:19pm	dark	3.8	light
20150715	51	HalfDark	157	3:05pm	light	32.93	light
20150715	52	HalfDark	157	3:05pm	dark	16.08	light
20150715	53	HalfDark	157	3:05pm	light	10.73	light
20150715	54	HalfDark	158	3:05pm	dark	41.93	dark
20150715	55	HalfDark	155	3:56pm	light	47.23	dark
20150715	56	HalfDark	155	3:56pm	dark	23.3	light
20150715	57	HalfDark	158	3:56pm	light	54.5	light
20150715	58	HalfDark	158	3:56pm	dark	63.28	light
20150715	59	HalfDark	155	5:15pm	light	10.97	light
20150715	60	HalfDark	156	5:15pm	dark	7.18	light
20150715	61	HalfDark	156	5:15pm	light	23.83	light
20150715	62	HalfDark	156	5:15pm	dark	11.95	dark
20150716	63	HalfDark	166	12:00pm	light	45.33	light
20150716	64	HalfDark	166	12:00pm	light	6.82	light
20150716	65	HalfDark	166	12:00pm	dark	32.93	dark
20150716	66	HalfDark	164	12:00pm	dark	14.33	light
20150716	67	HalfDark	164	12:55pm	light	3.63	dark
20150716	68	HalfDark	164	12:55pm	dark	5.67	light
20150716	69	HalfDark	165	12:55pm	dark	17.73	light
20150716	70	HalfDark	165	1:25pm	light	15.83	dark
20150716	71	HalfDark	163	1:25pm	dark	11.78	light
20150716	72	HalfDark	163	1:25pm	dark	5.43	light
20150716	73	HalfDark	162	1:48pm	light	21.33	light
20150716	74	HalfDark	162	1:48pm	dark	19.95	light
20150716	75	HalfDark	162	1:48pm	light	22.17	light
20150720	76	HalfDark	175	1:39pm	light	8.02	light
20150720	77	HalfDark	175	1:39pm	dark	6.85	light
20150720	78	HalfDark	175	1:39pm	light	7.13	dark
20150720	79	HalfDark	176	1:39pm	dark	7.92	dark
20150720	80	HalfDark	176	1:56pm	light	35.47	dark
20150720	81	HalfDark	176	1:56pm	light	18.27	dark
20150720	82	HalfDark	177	1:56pm	dark	50.82	light
20150720	83	HalfDark	177	1:56pm	dark	42.22	light
20150720	84	HalfDark	177	2:53pm	light	7.83	dark
20150720	85	HalfDark	178	2:53pm	light	27.72	light
20150720	86	HalfDark	178	2:53pm	dark	9.67	light
20150720	87	HalfDark	178	2:53pm	light	4.65	light
20150720	88	HalfDark	179	3:25pm	light	13.53	light
20150720	89	HalfDark	179	3:25pm	dark	3.7	light
20150720	90	HalfDark	179	3:25pm	dark	3.18	light
20150803	101	AllDark	215	1:49pm			light
20150803	102	AllDark	215	1:49pm			dark
20150803	103	AllDark	215	1:49pm			light
20150803	104	AllDark	215	1:49pm			dark
20150803	105	AllDark	216	1:49pm			dark
20150803	106	AllDark	216	1:49pm			dark
20150803	107	AllDark	216	1:49pm			light
20150803	108	AllDark	216	1:49pm			dark
20150803	109	AllDark	217	1:49pm			light
20150803	110	AllDark	217	1:49pm			dark
20150803	111	AllDark	217	1:49pm			dark
20150803	112	AllDark	217	1:49pm			dark
20150803	113	AllDark	218	1:49pm			dark
20150803	114	AllDark	218	1:49pm			light
20150803	115	AllDark	218	1:49pm			dark
20150803	116	AllDark	218	1:49pm			light
20150803	117	AllDark	219	1:49pm			dark
20150803	118	AllDark	219	1:49pm			light
20150803	119	AllDark	219	1:49pm			light
20150803	120	AllDark	219	1:49pm			light
