# Supplementary material for: When and where to hatch? Red-eyed treefrog embryos use light cues in two contexts
Source: PeerJ. 2018 Dec 3;6:e6018. doi: 10.7717/peerj.6018 (PMC6283037; doi:10.7717/peerj.6018)
Supplement: Supplemental Information 3 [file peerj-06-6018-s003.xlsx]

## Sheet: Glass-Cup Flooding
Date	Trial #	Age	Clutch	Video	HatchedintoGlass
20140621	1	4d	NA	KMW_0203	no
20140705	2	4d	39	KMW_4163	no
20140705	3	4d	38	KMW_4165	no
20140705	4	4d	37	KMW_4170	yes
20140705	5	4d	36	KMW_4173	no
20140707	6	4d	40	KMW_4191	yes
20140707	7	4d	41	KMW_4196	no
20140707	8	4d	46	KMW_4213	no
20140715	9	4d	51	KMW_4541	no
20140716	10	4d	52	KMW_4545	no
20140716	11	4d	53	KMW_4549	yes
20140716	12	4d	54	KMW_4553	yes
20140716	13	4d	55	KMW_4555	no
20140716	14	4d	56	KMW_4558	no
20140716	15	4d	57	KMW_4560	yes
20140716	16	4d	58	KMW_4565	no
20140716	17	4d	53	KMW_4568	no
20140716	18	4d	54	KMW_4570	no
20140716	19	4d	57	KMW_4572	yes
20140716	20	4d	58	KMW_4574	no
20140716	21	4d	57	KMW_4576	no

## Sheet: Whole-Clutch Flooding
Date	Trial #	Age	Clutch	StartTime	NumberofTestedEggs	HatchingAttempts	UnhatchedEggs	HatchedintoWater	HatchedintoJelly	DelayedEmergence
20150712	1	4d	143	12:43pm	22	11	11	9	0	2
20150714	2	4d	148	9:45am	37	4	33	3	0	1
20150714	3	4d	147	9:45am	11	4	7	3	0	1
20150715	4	4d	155	11:20am	33	21	12	19	0	2
20150715	5	4d	158	11:20am	20	9	11	8	1	0
20150715	6	4d	157	1:50pm	30	24	6	19	2	3
20150715	7	4d	156	7:00pm	14	10	4	8	1	1
20150716	8	4d	166	9:37am	34	12	22	12	0	0
20150716	9	4d	167	9:37am	20	5	15	5	0	0
20150716	10	4d	168	10:55am	23	17	6	16	1	0
20150719	11	4d	180	5:21pm	15	15	0	15	0	0
20150720	12	4d	175	4:45pm	25	23	2	21	1	1
20150722	13	4d	178	4:45pm	31	29	2	27	0	2
20150724	14	4d	181	1:56pm	24	21	3	17	1	3
